# Supplementary material for: Miyagawa Shuntei (1873-1914) y la serie "Bijin juni kagetsu": modas y constumbres tradicionales en el "ukiyo-e" de la era Meiji
Source: MDPI journal article supplement (doi:10.3390/jcm12175629), 2010-01-01
Supplement: s1 [file s1]

**Supplementary Table 1.** Baseline characteristics of the older patients not treated with percutaneous coronary intervention, grouped according to coronary angiography performance.

|                                                                                 | <b>Coronary<br/>Angiography<br/>yes<br/>(n=16,336)</b> | <b>Coronary<br/>Angiography<br/>no<br/>(n=56,815)</b> | <b>P value</b> |
|---------------------------------------------------------------------------------|--------------------------------------------------------|-------------------------------------------------------|----------------|
| <b>Age (years)</b>                                                              | 81±4                                                   | 85±6                                                  | <0.001         |
| <b>Gender (female)</b>                                                          | 8,009 (49%)                                            | 33,570 (59%)                                          | <0.001         |
| <b>STEMI, n (%)</b>                                                             | 5,030 (31%)                                            | 26,069 (46%)                                          | <0.001         |
| <b>NSTEMI, n (%)</b>                                                            | 11,306 (69%)                                           | 30,746 (54%)                                          | <0.001         |
| <b>History of comorbidities<br/>(in the previous 2 years),<br/>n (%)</b>        |                                                        |                                                       |                |
| Cerebrovascular disease                                                         | 530 (3%)                                               | 3,629 (6%)                                            | <0.001         |
| Hypertension                                                                    | 7,080 (43%)                                            | 22,092 (39%)                                          | <0.001         |
| Diabetes mellitus                                                               | 4,815 (29%)                                            | 17,415 (31%)                                          | 0.0039         |
| Chronic IHD                                                                     | 3,656 (22%)                                            | 13,063 (23%)                                          | 0.10           |
| Prior AMI                                                                       | 1,715 (10%)                                            | 8,679 (15%)                                           | <0.0001        |
| Atrial fibrillation                                                             | 1,578 (10%)                                            | 6,973 (12%)                                           | <0.001         |
| Chronic renal disease                                                           | 1,129 (7%)                                             | 7,102 (12%)                                           | <0.001         |
| COPD                                                                            | 1,097 (7%)                                             | 6,295 (11%)                                           | <0.001         |
| Cancer                                                                          | 1,797 (11%)                                            | 6,606 (12%)                                           | 0.02           |
| <b>Number of comorbidities<br/>n (%)</b>                                        |                                                        |                                                       | <0.001         |
| 0                                                                               | 4,621 (28%)                                            | 16,445 (30%)                                          |                |
| 1                                                                               | 5,573 (34%)                                            | 17,174 (30%)                                          |                |
| 2                                                                               | 3,707 (23%)                                            | 12,262 (22%)                                          |                |
| 3                                                                               | 1,655 (10%)                                            | 6,693 (12%)                                           |                |
| >3                                                                              | 780 (5%)                                               | 4,241 (7%)                                            |                |
| <b>Medications of interest<br/>(before index AMI), n (%)</b>                    |                                                        |                                                       |                |
| ACEi/ARB                                                                        | 11,164 (68%)                                           | 36,589 (64%)                                          | <0.001         |
| Beta blockers                                                                   | 6,752 (41%)                                            | 20,218 (36%)                                          | <0.001         |
| Diuretics                                                                       | 5,594 (34%)                                            | 27,270 (48%)                                          | <0.001         |
| Calcium-antagonists                                                             | 6,430 (39%)                                            | 22,280 (39%)                                          | 0.73           |
| Lipid lowering drugs                                                            | 7,114 (44%)                                            | 17,355 (31%)                                          | <0.001         |
| Antiplatelet drugs                                                              | 9,165 (56%)                                            | 32,557 (57%)                                          | 0.006          |
| Oral anticoagulant drugs                                                        | 1,577 (10%)                                            | 5,460 (10%)                                           | 0.86           |
| Anti-hyperglycemic drugs                                                        | 4,360 (27%)                                            | 15,254 (27%)                                          | 0.68           |
| <b>Medications of interest<br/>(after index hospital<br/>discharge)*, n (%)</b> |                                                        |                                                       |                |
| ACEi/ARB                                                                        | 11,164 (68%)                                           | 36,589 (64%)                                          | <0.0001        |
| Beta blockers                                                                   | 6,752 (41%)                                            | 20,218 (36%)                                          | <0.0001        |
| Diuretics                                                                       | 5,594 (34%)                                            | 27,270 (48%)                                          | <0.0001        |
| Calcium-antagonists                                                             | 6,430 (39%)                                            | 22,280 (39%)                                          | 0.73           |

|                          |             |              |         |
|--------------------------|-------------|--------------|---------|
| Lipid lowering drugs     | 7,114 (43%) | 17,355 (30%) | <0.0001 |
| Antiplatelet drugs       | 9,165 (56%) | 32,557 (57%) | 0.006   |
| Oral anticoagulant drugs | 1,577 (10%) | 5,460 (10%)  | 0.86    |
| Anti-hyperglycemic drugs | 4,360 (27%) | 15,254 (27%) | 0.68    |

**Abbreviations:** ACEi=angiotensin-converting enzyme inhibitors; AMI=acute myocardial infarction; ARB=angiotensin receptor blockers; COPD=chronic obstructive pulmonary disease; IHD=ischemic heart disease; NSTEMI=non-ST-elevation myocardial infarction; PCI=percutaneous coronary intervention; STEMI=ST-elevation myocardial infarction.

\*Medications after hospital discharge were computed in patients surviving index hospitalization.

**Supplementary Table 2.** Baseline characteristics of older patient cohort hospitalized with acute myocardial infarction, stratified according to the four study periods.

|                                                                      | <b>Pts hospitalized<br/>between 2003-2006<br/>(n=26,951)</b> | <b>Pts hospitalized<br/>between 2007-2010<br/>(n=30,237)</b> | <b>Pts hospitalized<br/>Between 2011-2014<br/>(n=30,251)</b> | <b>Pts hospitalized<br/>between 2015-2018<br/>(n=28,624)</b> | <b>P for trend</b> |
|----------------------------------------------------------------------|--------------------------------------------------------------|--------------------------------------------------------------|--------------------------------------------------------------|--------------------------------------------------------------|--------------------|
| <b>Age (years)</b>                                                   | 83±6                                                         | 83±5                                                         | 82±6                                                         | 83±6                                                         | <0.001             |
| <b>Age groups (years), n (%)</b>                                     |                                                              |                                                              |                                                              |                                                              | <0.001             |
| 75-80                                                                | 11,225 (42%)                                                 | 11,790 (10%)                                                 | 11,215 (10%)                                                 | 10,747 (9%)                                                  |                    |
| 81-85                                                                | 8,406 (31%)                                                  | 9,386 (8%)                                                   | 9,023 (8%)                                                   | 8,289 (7%)                                                   |                    |
| 86-90                                                                | 4,413 (16%)                                                  | 6,216 (5%)                                                   | 6,760 (6%)                                                   | 6,222 (5%)                                                   |                    |
| >90                                                                  | 2,907 (11%)                                                  | 2,845 (2%)                                                   | 3,253 (3%)                                                   | 3,366 (3%)                                                   |                    |
| <b>Gender (females), n (%)</b>                                       | 14,726 (55%)                                                 | 16,292 (54%)                                                 | 15,484 (51%)                                                 | 13,878 (48%)                                                 |                    |
| STEMI                                                                | 15,313 (57%)                                                 | 14,872 (49%)                                                 | 12,632 (42%)                                                 | 10,579 (37%)                                                 | <0.001             |
| NSTEMI                                                               | 11,638 (43%)                                                 | 15,365 (51%)                                                 | 17,619 (58%)                                                 | 18,045 (63%)                                                 | <0.001             |
| PCI during index<br>hospitalization, n (%)                           | 5,953 (22%)                                                  | 10,177 (34%)                                                 | 12,636 (42%)                                                 | 14,145 (49%)                                                 | <0.001             |
| <b>History of comorbidities (in<br/>the previous 2 years), n (%)</b> |                                                              |                                                              |                                                              |                                                              |                    |
| Cerebrovascular disease                                              | 1,702 (6%)                                                   | 1,499 (5%)                                                   | 1,158 (4%)                                                   | 832 (3%)                                                     | <0.001             |
| Hypertension                                                         | 9,903 (37%)                                                  | 12,040 (40%)                                                 | 12,271 (42%)                                                 | 12,261 (43%)                                                 | <0.001             |
| Diabetes mellitus                                                    | 7,248 (27%)                                                  | 8,822 (29%)                                                  | 9,224 (30%)                                                  | 9,103 (32%)                                                  | <0.001             |
| Chronic IHD                                                          | 5319 (20%)                                                   | 6,211 (21%)                                                  | 7,294 (24%)                                                  | 8,363 (29%)                                                  | <0.001             |
| Prior AMI                                                            | 3,716 (14%)                                                  | 4,133 (14%)                                                  | 3,615 (12%)                                                  | 2,851 (10%)                                                  | <0.001             |
| Atrial fibrillation                                                  | 2,681 (10%)                                                  | 2,987 (10%)                                                  | 3,075 (10%)                                                  | 2,983 (10%)                                                  | 0.03               |
| Chronic renal disease                                                | 2,475 (9%)                                                   | 3,035 (10%)                                                  | 2,743 (9%)                                                   | 2,770 (10%)                                                  | 0.60               |
| COPD                                                                 | 2,760 (10%)                                                  | 2,830 (9%)                                                   | 2,191 (7%)                                                   | 1,892 (7%)                                                   | <0.001             |
| Cancer                                                               | 2,688 (10%)                                                  | 3,323 (11%)                                                  | 3,534 (12%)                                                  | 3,863 (13%)                                                  | <0.001             |
| <b>Number of comorbidities<br/>n (%)</b>                             |                                                              |                                                              |                                                              |                                                              |                    |
| 0                                                                    | 9,250 (34%)                                                  | 9,350 (31%)                                                  | 8,521 (28%)                                                  | 6,921 (24%)                                                  | <0.001             |

|                                                                               |              |              |              |              |         |
|-------------------------------------------------------------------------------|--------------|--------------|--------------|--------------|---------|
| 1                                                                             | 8,230 (31%)  | 9,639 (32%)  | 10,054 (33%) | 9,448 (33%)  |         |
| 2                                                                             | 5,291 (20%)  | 6,294 (21%)  | 6,756 (22%)  | 7,005 (24%)  |         |
| 3                                                                             | 2,676 (10%)  | 3,119 (10%)  | 3,189 (11%)  | 3,531 (12%)  |         |
| >3                                                                            | 1,504 (6%)   | 1,835 (6%)   | 1,731 (6%)   | 1,719 (6%)   |         |
| <b>Medications of interest</b><br>(before index hospitalization),<br>n (%)    |              |              |              |              |         |
| ACE-I/ARBS                                                                    | 16,218 (60%) | 19,573 (65%) | 20,289 (67%) | 18,926 (66%) | <0.001  |
| Beta blockers                                                                 | 20,044 (74%) | 19,730 (66%) | 17,538 (58%) | 15,042 (53%) | <0.001  |
| Diuretics                                                                     | 10,800 (40%) | 11,941 (34%) | 11,741 (39%) | 10,675 (37%) | <0.001  |
| Ca-antagonists                                                                | 11,136 (41%) | 11,900 (39%) | 11,556 (38%) | 10,286 (36%) | <0.001  |
| Lipid lowering drugs                                                          | 6,364 (24%)  | 9,765 (32%)  | 12,287 (41%) | 13,153 (46%) | <0.001  |
| Antiplatelet drugs                                                            | 13,955 (52%) | 17,424 (58%) | 18,336 (61%) | 14,844 (52%) | 0.036   |
| Oral anticoagulant drugs                                                      | 1,681 (6%)   | 2,419 (8%)   | 2,853 (9%)   | 3,391 (12%)  | <0.001  |
| Antihyperglycemic drugs                                                       | 6,385 (24%)  | 7,840 (26%)  | 8,186 (27%)  | 8,101 (28%)  | <0.001  |
| <b>Medications of interest</b><br>(after index hospital<br>discharge)*, n (%) |              |              |              |              |         |
| ACE-I/ARBS                                                                    | 2,954 (13%)  | 3,070 (12%)  | 2,448 (9%)   | 1,481 (6%)   | 0.002   |
| Beta blockers                                                                 | 2,100 (9%)   | 2,605 (10%)  | 2,485 (9%)   | 1,754 (7%)   | <0.0001 |
| Diuretics                                                                     | 3,661 (16%)  | 3,845 (15%)  | 3,316 (12%)  | 2,136 (8%)   | <0.0001 |
| Ca-antagonists                                                                | 1,103 (5%)   | 1,290 (5%)   | 1,035 (4%)   | 781 (3%)     | <0.0001 |
| Lipid lowering drugs                                                          | 1,746 (7%)   | 2,283 (9%)   | 2,178 (8%)   | 1,547 (6%)   | <0.0001 |
| Antiplatelet drugs                                                            | 2,813 (12%)  | 3,107 (12%)  | 2,722 (10%)  | 1,713 (7%)   | <0.0001 |
| Oral anticoagulant drugs                                                      | 690 (3%)     | 830 (3%)     | 766 (3%)     | 692 (3%)     | <0.0001 |
| Antihyperglycemic drugs                                                       | 1,224 (5%)   | 1,459 (6%)   | 1,296 (5%)   | 811 (3%)     | <0.0001 |

**Abbreviations:** ACEi=angiotensin-converting enzyme inhibitors; AMI=acute myocardial infarction; ARB=angiotensin receptor blockers; COPD=chronic obstructive pulmonary disease; IHD=ischemic heart disease; NSTEMI=non-ST-elevation myocardial infarction; PCI=percutaneous coronary intervention; STEMI=ST-elevation myocardial infarction.

\*Medications after hospital discharge were computed in patients surviving index hospitalization.

## Supplemental Material Figure 1.

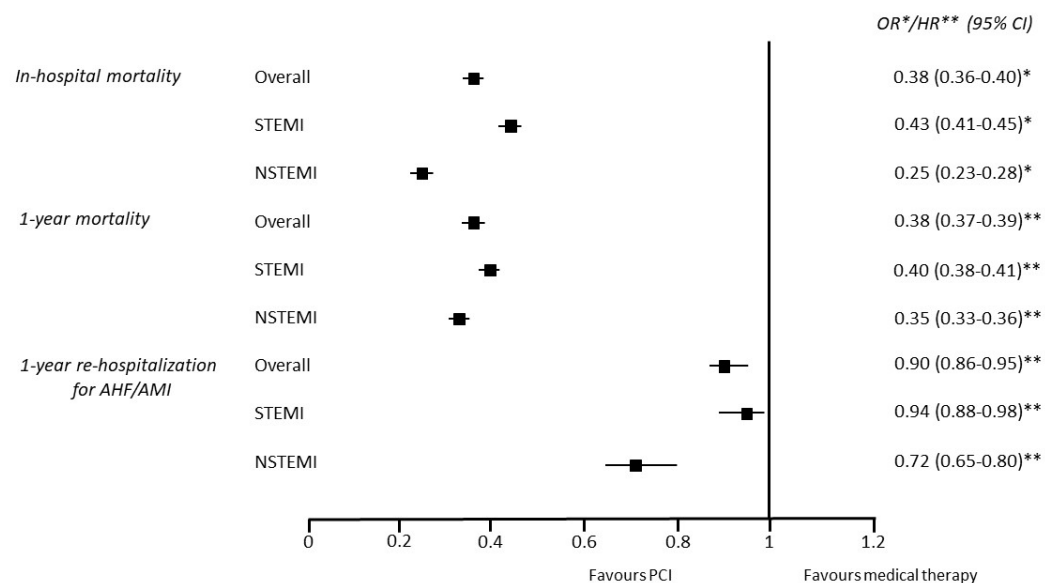

## Supplemental Material Figure 1.

Risk of the primary and secondary endpoints associated with percutaneous coronary intervention (PCI) use in the matched cohort of patients  $\geq 75$  years and in STEMI and NSTEMI patients considered separately. AHF = acute heart failure; AMI = acute myocardial infarction; CI = confidence interval; HR = hazard ratio; OR = odds ratio.

**Supplemental Material Figure 2.**

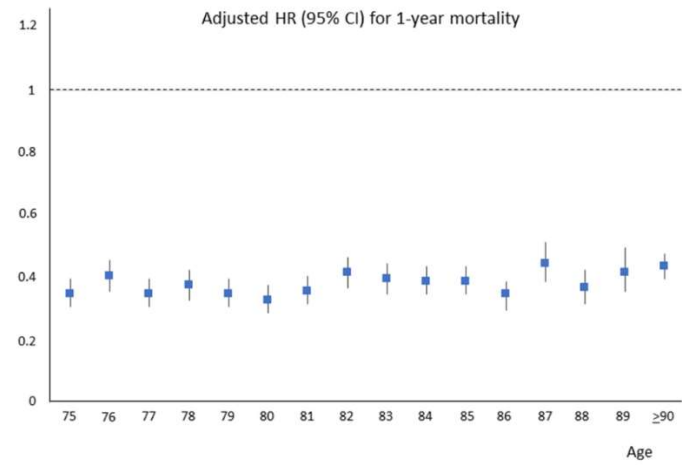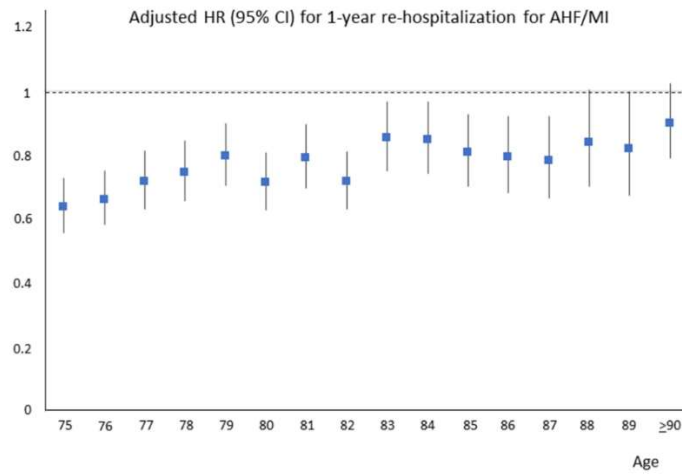

**Supplemental Material Figure 2.** Adjusted risk of 1-year mortality (upper panel) and 1-year re-hospitalization for acute heart failure (AHF) or acute myocardial infarction (AMI) (lower panel) associated with percutaneous coronary intervention (PCI) use across ages. CI = confidence interval; HR = hazard ratio.



### Supplemental Material Figure 3.

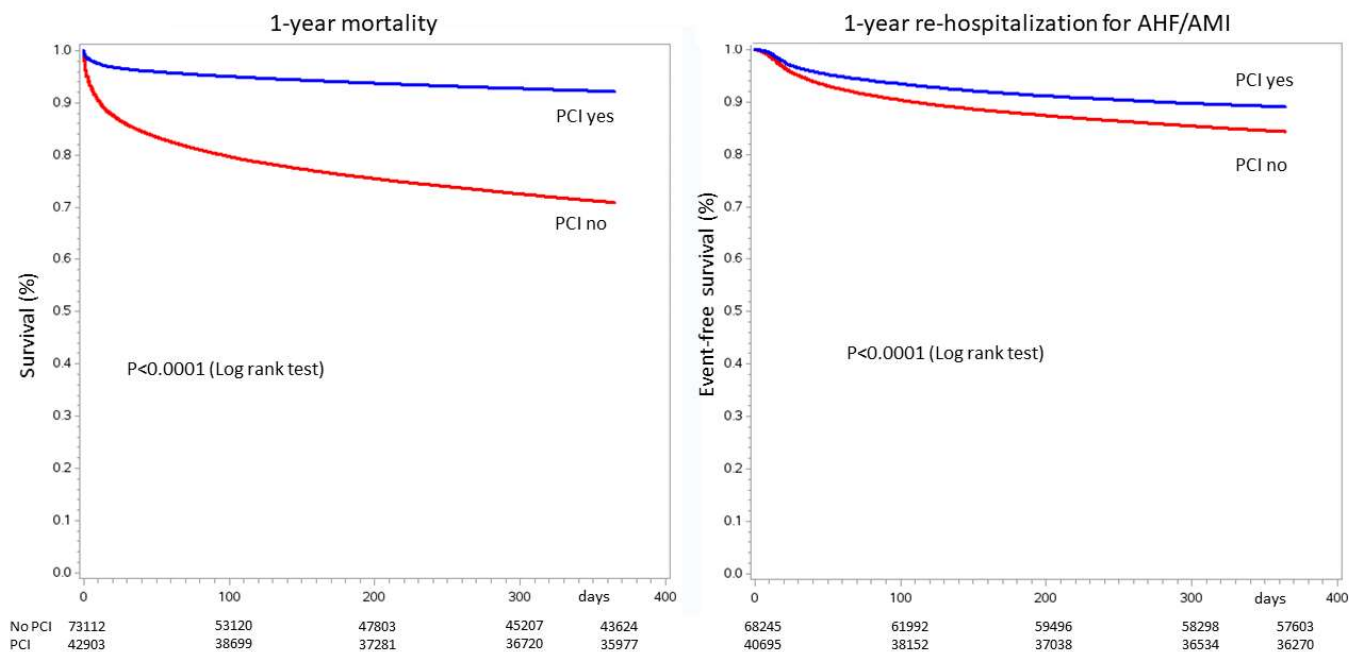

**Supplemental Material Figure 3.** Kaplan-Meier curves for secondary endpoints stratified by percutaneous coronary intervention (PCI) use in the overall older patient cohort. AHF = acute heart failure; AMI = acute myocardial infarction.
